# Supplementary material
Source: HighWire-hosted journal article supplement (https://cmaj.ca/highwire/filestream/75790/field_highwire_adjunct_files/4/200645-res-5-at.pdf)
Supplement: 200645-res-5-at.pdf [file 200645-res-5-at.pdf]

---

## **Appendix 5 (as supplied by the authors): Risk of bias assessment**

Table 1: Risk of bias of included studies for COVID-19 with ARDS

Table 2: Risk of bias of included randomized controlled trials for ARDS

Table 3: Risk of bias of included studies for COVID-19

Table 4: Risk of bias of included cohort studies for SARS

Table 5: Risk of bias of included randomized controlled trial for SARS

Table 6: Risk of bias of included studies for MERS

Table 7: Risk of bias of included cohort studies for influenza

Table 8: Risk of bias of included randomized controlled trial for influenza

Table 9: Risk of bias of included randomized controlled trials for CAP

---

**Table 1: Risk of bias of included studies for COVID-19 with ARDS**

| <b>Study</b> | <b>From the same population</b> | <b>Assessment of exposure</b> | <b>Outcome not present at start</b> | <b>Adjustment</b> | <b>Assessment of prognostic factors</b> | <b>Assessment of outcome</b> | <b>Adequate follow-up</b> | <b>Co-Interventions similar</b> |
|--------------|---------------------------------|-------------------------------|-------------------------------------|-------------------|-----------------------------------------|------------------------------|---------------------------|---------------------------------|
| Wu 2020      | Low                             | Probably low                  | Low                                 | Probably low      | Probably low                            | Low                          | Low                       | Probably high                   |

---

**Table 2: Risk of bias of included randomized controlled trials for ARDS**

---

| <b>Study</b>    | <b>Sequence Generation</b> | <b>Allocation Sequence Concealment</b> | <b>Blinding (Performance bias)</b> | <b>Blinding (Outcome measurement)</b> | <b>Missing Outcome Data</b> | <b>Other Bias</b> | <b>Comments</b>                                                                                                                                       |
|-----------------|----------------------------|----------------------------------------|------------------------------------|---------------------------------------|-----------------------------|-------------------|-------------------------------------------------------------------------------------------------------------------------------------------------------|
| Steinberg, 2006 | Low                        | Low                                    | Low                                | Low                                   | Low                         | Low               | None                                                                                                                                                  |
| Meduri, 2007    | Low                        | Low                                    | Low                                | Low                                   | Low                         | Probably High     | Lack of protocol.                                                                                                                                     |
| Liu, 2012       | Low                        | Probably low                           | Low                                | Low                                   | Low                         | Probably High     | Allocation concealment is not reported and lack of protocol.                                                                                          |
| Rezk, 2013      | High                       | Probably High                          | Low                                | Low                                   | Low                         | Probably High     | Baseline characteristics are imbalance and no detail of random sequence generation or allocation concealment and lack of protocol.                    |
| Zhao, 2014      | Low                        | Probably low                           | Low                                | Low                                   | Low                         | Probably High     | Lack of protocol.                                                                                                                                     |
| Tongyoo, 2016   | Low                        | Probably low                           | Low                                | Low                                   | Low                         | High              | Discrepancies between the clinical trial registry and the study.                                                                                      |
| Villar, 2020    | Low                        | Low                                    | Low                                | Low                                   | Low                         | Probably Low      | This trial was stopped early, however, authors reported stopping roles, less than a 100 events, probability of overestimation of the effect estimate. |

---

---

**Table 3: Risk of bias of included studies for COVID-19**

| <b>Study</b> | <b>From the same population</b> | <b>Assessment of exposure</b> | <b>Outcome not present at start</b> | <b>Adjustment</b> | <b>Assessment of prognostic factors</b> | <b>Assessment of outcome</b> | <b>Adequate follow-up</b> | <b>Co-Interventions similar</b> |
|--------------|---------------------------------|-------------------------------|-------------------------------------|-------------------|-----------------------------------------|------------------------------|---------------------------|---------------------------------|
| Li 2020      | Low                             | Low                           | Low                                 | Probably low      | Probably low                            | Low                          | Probably low              | Probably high                   |
| Lu 2020      | Low                             | Low                           | Low                                 | Probably low      | Probably low                            | Low                          | Probably low              | Probably high                   |
| Wang 2020    | Low                             | Low                           | Low                                 | Probably high     | Probably low                            | Low                          | Probably low              | Probably high                   |
| Xu 2020      | Low                             | Low                           | Low                                 | Probably low      | Probably low                            | Low                          | Probably low              | Probably high                   |
| Yan 2020     | Low                             | Low                           | Low                                 | Probably high     | Probably low                            | Low                          | Probably low              | Probably high                   |

---

**Table 4: Risk of bias of included cohort studies for SARS**

| <b>Study</b> | <b>From the same population</b> | <b>Assessment of exposure</b> | <b>Outcome not present at start</b> | <b>Adjustment</b> | <b>Assessment of prognostic factors</b> | <b>Assessment of outcome</b> | <b>Adequate follow-up</b> | <b>Co-Interventions similar</b> |
|--------------|---------------------------------|-------------------------------|-------------------------------------|-------------------|-----------------------------------------|------------------------------|---------------------------|---------------------------------|
| Lau 2009     | Low                             | Low                           | Low                                 | Probably low      | Low                                     | Low                          | Low                       | Probably high                   |
| Long 2016    | Low                             | Low                           | Low                                 | Probably low      | Low                                     | Low                          | Low                       | Probably high                   |

---

**Table 5: Risk of bias of included randomized controlled trial for SARS**

| <b>Study</b> | <b>Sequence Generation</b> | <b>Allocation Sequence<br/>Concealment</b> | <b>Blinding</b> | <b>Missing Outcome Data</b> | <b>Other Bias</b> |
|--------------|----------------------------|--------------------------------------------|-----------------|-----------------------------|-------------------|
| Lee 2004     | Probably low               | Probably low                               | Probably low    | High                        | Low               |

---

**Table 6: Risk of bias of included studies for MERS**

| <b>Study</b> | <b>From the same population</b> | <b>Assessment of exposure</b> | <b>Outcome not present at start</b> | <b>Adjustment</b> | <b>Assessment of prognostic factors</b> | <b>Assessment of outcome</b> | <b>Adequate follow-up</b> | <b>Co-Interventions similar</b> |
|--------------|---------------------------------|-------------------------------|-------------------------------------|-------------------|-----------------------------------------|------------------------------|---------------------------|---------------------------------|
| Alfaraj 2019 | Low                             | Probably low                  | Low                                 | Probably high     | Probably low                            | Low                          | Low                       | Probably high                   |
| Arabi 2018   | Low                             | Probably low                  | Low                                 | Probably low      | Probably low                            | Low                          | Probably low              | High                            |

**Table 7: Risk of bias of included cohort studies for influenza**

| <b>Study</b>           | <b>From the same population</b> | <b>Assessment of exposure</b> | <b>Outcome not present at start</b> | <b>Adjustment</b> | <b>Assessment of prognostic factors</b> | <b>Assessment of outcome</b> | <b>Adequate follow-up</b> | <b>Co-Interventions similar</b> |
|------------------------|---------------------------------|-------------------------------|-------------------------------------|-------------------|-----------------------------------------|------------------------------|---------------------------|---------------------------------|
| Al-Busaidi 2016        | Yes                             | Yes                           | Yes                                 | Probably yes      | Probably no                             | Yes                          | Yes                       | No                              |
| Balaganesakumar 2013   | Yes                             | Probably yes                  | Yes                                 | Probably yes      | Probably yes                            | Yes                          | Yes                       | No                              |
| Boudreault 2011        | Yes                             | Yes                           | Yes                                 | Probably yes      | Probably yes                            | Yes                          | Yes                       | Probably no                     |
| Brun-Buisson 2011      | Yes                             | Yes                           | Yes                                 | Yes               | Yes                                     | Yes                          | Yes                       | Probably no                     |
| Cao 2016               | Yes                             | Yes                           | Yes                                 | Yes               | Yes                                     | Yes                          | Yes                       | Probably no                     |
| Chawla 2013            | Yes                             | Yes                           | Yes                                 | No                | Probably no                             | Yes                          | Yes                       | No                              |
| Delaney 2016           | Yes                             | Yes                           | Yes                                 | Yes               | Probably yes                            | Yes                          | Yes                       | Probably yes                    |
| Delgado-Rodriguez 2012 | Yes                             | Probably yes                  | Probably no                         | Probably yes      | Yes                                     | Yes                          | Yes                       | No                              |
| Han 2011               | Yes                             | Yes                           | Probably yes                        | Probably yes      | Yes                                     | Probably yes                 | Yes                       | No                              |
| Jain 2009              | Yes                             | Yes                           | Yes                                 | No                | Probably yes                            | Yes                          | Yes                       | No                              |
| Huang 2017             | Yes                             | Yes                           | Yes                                 | No                | Probably no                             | Yes                          | Yes                       | No                              |
| Kim 2011               | Yes                             | Yes                           | Yes                                 | Probably no       | Probably yes                            | Yes                          | Yes                       | No                              |
| Kinikar 2012           | Yes                             | Yes                           | Yes                                 | No                | Probably yes                            | Yes                          | Yes                       | No                              |
| Kudo 2012              | Yes                             | Yes                           | Yes                                 | No                | Probably no                             | Yes                          | Yes                       | No                              |
| Lee 2015               | Yes                             | Yes                           | Yes                                 | Probably yes      | Probably yes                            | Yes                          | Yes                       | Probably yes                    |
| Li 2012                | Yes                             | Probably no                   | Yes                                 | No                | Probably no                             | Yes                          | Yes                       | No                              |
| Li 2017                | Yes                             | Yes                           | Yes                                 | Yes               | Probably yes                            | Yes                          | Yes                       | Yes                             |
| Liem 2009              | Yes                             | Yes                           | Yes                                 | No                | Probably yes                            | Yes                          | Yes                       | No                              |
| Linko 2011             | Yes                             | Yes                           | Yes                                 | Probably yes      | Probably yes                            | Yes                          | Yes                       | No                              |



---

|                          |     |              |     |              |              |              |     |              |
|--------------------------|-----|--------------|-----|--------------|--------------|--------------|-----|--------------|
| Mady 2012                | Yes | No           | Yes | No           | No           | No           | Yes | No           |
| Moreno 2018              | Yes | Yes          | Yes | Yes          | Probably yes | Yes          | Yes | No           |
| Ono 2016                 | Yes | Yes          | Yes | Yes          | Probably yes | Yes          | Yes | Probably no  |
| Patel 2013               | Yes | Yes          | Yes | No           | Probably yes | Yes          | Yes | Probably no  |
| Sertogullarindan<br>2011 | Yes | Probably yes | Yes | No           | Probably no  | Yes          | Yes | No           |
| Tsai 2020                | Yes | Yes          | Yes | Probably yes | Probably yes | Yes          | Yes | Probably yes |
| Viasus 2011              | Yes | Probably yes | Yes | No           | Probably no  | Yes          | Yes | No           |
| Wu 2012                  | Yes | No           | No  | Probably yes | Probably no  | Probably yes | Yes | Probably no  |
| Xi 2010                  | Yes | Yes          | Yes | Probably yes | Probably yes | Yes          | Yes | Probably no  |
| Yu 2011                  | Yes | Yes          | Yes | Yes          | Probably yes | Yes          | Yes | Probably no  |

---

---

**Table 8: Risk of bias of included randomized controlled trial for influenza**

| <b>Study</b> | <b>Sequence Generation</b> | <b>Allocation Sequence<br/>Concealment</b> | <b>Blinding</b> | <b>Missing Outcome Data</b> | <b>Other Bias</b> |
|--------------|----------------------------|--------------------------------------------|-----------------|-----------------------------|-------------------|
| Wirz 2016    | Low                        | Low                                        | Low             | Low                         | Probably low      |

**Table 9: Risk of bias of included randomized controlled trials for CAP**

| <b>Study</b>      | <b>Sequence Generation</b> | <b>Allocation Sequence Concealment</b> | <b>Blinding (Performance bias)</b> | <b>Blinding (Outcome measurement)</b> | <b>Missing Outcome Data</b> | <b>Other Bias</b> | <b>Comments</b>                                                                                                            |
|-------------------|----------------------------|----------------------------------------|------------------------------------|---------------------------------------|-----------------------------|-------------------|----------------------------------------------------------------------------------------------------------------------------|
| Wagner 1956       | High                       | Probably High                          | Low                                | Low                                   | Low                         | Probably High     | Quasi-randomized controlled trial and lack of protocol.                                                                    |
| McHardy 1972      | Probably Low               | Low                                    | Probably High                      | Probably High                         | Probably High               | Probably High     | Lack of blinding, drop-out without explanation and lack of protocol.                                                       |
| Marik 1993        | Low                        | Probably low                           | Probably High                      | Probably High                         | Low                         | Probably High     | Lack of blinding and and lack of protocol.                                                                                 |
| Confalonieri 2005 | Low                        | Low                                    | Low                                | Low                                   | Low                         | High              | The trial stopped early and stopping role was a surrogate outcome with less of 50 patients included.                       |
| El-Ghamrawy, 2006 | Probably High              | Probably High                          | Probably High                      | Probably Low                          | Low                         | Probably High     | Lack of information about random sequence generation, lack of protocol (sample size calculation) and blinding pf personal. |
| Mikami 2007       | Probably High              | Probably High                          | Probably High                      | Probably Low                          | Low                         | Probably High     | Lack of information about random sequence generation, lack of protocol and blinding pf personal.                           |
| Snijders 2010     | Low                        | Low                                    | Low                                | Low                                   | Low                         | High              | Discrepancy between outcome reported in the registry and the published trial.                                              |

---

|                         |               |               |               |              |     |               |                                                                                                                                        |
|-------------------------|---------------|---------------|---------------|--------------|-----|---------------|----------------------------------------------------------------------------------------------------------------------------------------|
| Fernández-Serrano, 2011 | Probably High | Probably High | Low           | Low          | Low | Low           | Lack of information about random sequence generation.                                                                                  |
| Meijvis 2011            | Low           | Low           | Low           | Low          | Low | High          | Discrepancy between outcome reported in the registry and the published trial.                                                          |
| Sabry 2011              | Probably High | Probably High | Low           | Low          | Low | High          | Lack of information about random sequence generation and discrepancy between outcome reported in the registry and the published trial. |
| Nafae 2013              | Probably High | Probably High | Probably low  | Probably low | Low | Probably High | Lack of information about random sequence generation and lack of protocol.                                                             |
| Blum 2015               | Low           | Low           | Low           | Low          | Low | Probably High | Only the primary outcome was reported in the registry.                                                                                 |
| Torres 2015             | Low           | Low           | Low           | Low          | Low | Probably Low  | None                                                                                                                                   |
| Gang 2016               | Low           | Probably Low  | Probably High | Low          | Low | Probably High | Lack of protocol, sample size calculation and blinding in the personal.                                                                |

---
